# Supplementary material for: Zinc(II) and cobalt(II) complexes of (3-carboxymethoxy-naphthalen-2-yloxy)-acetic acid: a structural study
Source: Royal Society of Chemistry journal article supplement (doi:10.1039/b817416d), 2009-01-01
Supplement: b817416d.pdf [file b817416d.pdf]

### Supplementary Information

## Zinc(II) and cobalt(II) complexes of (3-carboxymethoxy-naphthalen-2-yloxy)-acetic acid : a structural study

Anirban Karmakar, Jubaraj B. Baruah\* and R. Boomi Shankar

Department of Chemistry, Indian Institute of Technology Guwahati, Guwahati 781 039 Assam,  
India; email: [juba@iitg.ernet.in](mailto:juba@iitg.ernet.in)

The X-ray single crystal data were collected at 296K with Mo $K\alpha$  radiation ( $\lambda = 0.71073$  Å) using a Bruker Nonius SMART CCD diffractometer equipped with graphite monochromator. The SMART software was used for data collection and also for indexing the reflections and determining the unit cell parameters; the collected data were integrated using SAINT software. The structures were solved by direct methods and refined by full-matrix least-squares calculations using SHELXTL software. All the non-H atoms were refined in the anisotropic approximation against  $F^2$  of all reflections. The H-atoms, except those attached to N, O were placed at their calculated positions and refined in the isotropic approximation; those attached to heteroatoms (N, O) were located in the difference Fourier maps, and refined with isotropic displacement coefficients.

### Crystal data and refinement parameters for the complexes 1-8

| Compound No.                 | 1                                                                  | 2                                                                | 3                                                                                 |
|------------------------------|--------------------------------------------------------------------|------------------------------------------------------------------|-----------------------------------------------------------------------------------|
| Formulae                     | C <sub>28</sub> H <sub>22</sub> Na <sub>2</sub> O <sub>14</sub> Zn | C <sub>26</sub> H <sub>29</sub> N <sub>7</sub> O <sub>7</sub> Zn | C <sub>148</sub> H <sub>176</sub> N <sub>20</sub> O <sub>70</sub> Zn <sub>8</sub> |
| Mol. wt.                     | 693.81                                                             | 616.93                                                           | 3878.05                                                                           |
| Crystal system               | Monoclinic                                                         | Monoclinic                                                       | Triclinic                                                                         |
| Space group                  | C2/c                                                               | P2 <sub>1</sub> /c                                               | P-1                                                                               |
| Temperature /K               | 296                                                                | 296                                                              | 296                                                                               |
| Wavelength /Å                | 0.71073                                                            | 0.71073                                                          | 0.71073                                                                           |
| <i>a</i> /Å                  | 16.3719(6)                                                         | 9.3548(3)                                                        | 11.3948(5)                                                                        |
| <i>b</i> /Å                  | 22.7018(6)                                                         | 18.3574(6)                                                       | 17.2622(7)                                                                        |
| <i>c</i> /Å                  | 7.4514(2)                                                          | 18.7369(6)                                                       | 22.0932(9)                                                                        |
| $\alpha$ /°                  | 90.00                                                              | 90.00                                                            | 98.390(2)                                                                         |
| $\beta$ /°                   | 94.705(2)                                                          | 115.724(2)                                                       | 90.784(2)                                                                         |
| $\gamma$ /°                  | 90.00                                                              | 90.00                                                            | 98.487(2)                                                                         |
| <i>V</i> / Å <sup>3</sup>    | 2760.14(15)                                                        | 2898.80(16)                                                      | 4249.4(3)                                                                         |
| <i>Z</i>                     | 4                                                                  | 4                                                                | 1                                                                                 |
| Density/Mgm <sup>-3</sup>    | 1.670                                                              | 1.414                                                            | 1.515                                                                             |
| Abs. Coeff./mm <sup>-1</sup> | 0.997                                                              | 0.903                                                            | 1.209                                                                             |
| Abs. correction              | None                                                               | None                                                             | None                                                                              |
| F(000)                       | 1416                                                               | 1280                                                             | 2004                                                                              |
| Total no. of                 | 20978                                                              | 24225                                                            | 42586                                                                             |

Electronic Supplementary Material for CrystEngComm  
 This journal is (c) The Royal Society of Chemistry 2009

|                                |                                                                          |                                                                            |                                                                            |
|--------------------------------|--------------------------------------------------------------------------|----------------------------------------------------------------------------|----------------------------------------------------------------------------|
| reflections                    |                                                                          |                                                                            |                                                                            |
| Reflections, $I > 2\sigma(I)$  | 3376                                                                     | 4849                                                                       | 16377                                                                      |
| Max. $2\theta/^\circ$          | 28.35                                                                    | 25.00                                                                      | 26.00                                                                      |
| Ranges (h, k, l)               | -21 $\leq$ h $\leq$ 21<br>-30 $\leq$ k $\leq$ 30<br>-9 $\leq$ l $\leq$ 9 | -10 $\leq$ h $\leq$ 10<br>-21 $\leq$ k $\leq$ 21<br>-20 $\leq$ l $\leq$ 21 | -13 $\leq$ h $\leq$ 14<br>-20 $\leq$ k $\leq$ 21<br>-27 $\leq$ l $\leq$ 26 |
| Complete to $2\theta$ (%)      | 97.9                                                                     | 95.0                                                                       | 98.1                                                                       |
| Refinement method              | Full-matrix least-squares on $F^2$                                       | Full-matrix least-squares on $F^2$                                         | Full-matrix least-squares on $F^2$                                         |
| Data/ Restraints/Parameters    | 3376 / 0 / 204                                                           | 4849 / 0 / 380                                                             | 16377 / 0 / 1133                                                           |
| Goof ( $F^2$ )                 | 1.028                                                                    | 1.036                                                                      | 1.054                                                                      |
| R indices [ $I > 2\sigma(I)$ ] | 0.0328                                                                   | 0.0442                                                                     | 0.0692                                                                     |
| R indices (all data)           | 0.0438                                                                   | 0.0600                                                                     | 0.1093                                                                     |

| Compound No.                   | 4                                                                          | 5                                                                          | 6                                                                          |
|--------------------------------|----------------------------------------------------------------------------|----------------------------------------------------------------------------|----------------------------------------------------------------------------|
| Formulae                       | $C_{40}H_{42}N_4Na_2O_{18}Zn_2$                                            | $C_{25}H_{28}N_2O_9Zn$                                                     | $C_{25}H_{28}CoN_2O_9$                                                     |
| Mol. wt.                       | 1043.50                                                                    | 565.86                                                                     | 559.42                                                                     |
| Crystal system                 | Triclinic                                                                  | Monoclinic                                                                 | Monoclinic                                                                 |
| Space group                    | P-1                                                                        | $P2_1/c$                                                                   | $P2(1)/c$                                                                  |
| Temperature /K                 | 296                                                                        | 296                                                                        | 296                                                                        |
| Wavelength /Å                  | 0.71073                                                                    | 0.71073                                                                    | 0.71073                                                                    |
| $a$ /Å                         | 8.6774(7)                                                                  | 10.727(2)                                                                  | 10.7482(5)                                                                 |
| $b$ /Å                         | 11.7824(9)                                                                 | 17.456(4)                                                                  | 17.4273(8)                                                                 |
| $c$ /Å                         | 12.3236(15)                                                                | 16.435(3)                                                                  | 16.4072(6)                                                                 |
| $\alpha/^\circ$                | 108.070(3)                                                                 | 90.00                                                                      | 90.00                                                                      |
| $\beta/^\circ$                 | 94.205(3)                                                                  | 120.721(12)                                                                | 120.690(2)                                                                 |
| $\gamma/^\circ$                | 109.158(2)                                                                 | 90.00                                                                      | 90.00                                                                      |
| $V$ / Å <sup>3</sup>           | 1109.77(18)                                                                | 2645.6(9)                                                                  | 2642.8(2)                                                                  |
| $Z$                            | 1                                                                          | 4                                                                          | 4                                                                          |
| Density/Mgm <sup>-3</sup>      | 1.561                                                                      | 1.421                                                                      | 1.406                                                                      |
| Abs. Coeff. /mm <sup>-1</sup>  | 1.181                                                                      | 0.982                                                                      | 0.703                                                                      |
| Abs. correction                | None                                                                       | None                                                                       | None                                                                       |
| F(000)                         | 536                                                                        | 1176                                                                       | 1164                                                                       |
| Total no. of reflections       | 12883                                                                      | 22153                                                                      | 26662                                                                      |
| Reflections, $I > 2\sigma(I)$  | 5282                                                                       | 4737                                                                       | 6238                                                                       |
| Max. $2\theta/^\circ$          | 28.36                                                                      | 25.50                                                                      | 28.36                                                                      |
| Ranges (h, k, l)               | -11 $\leq$ h $\leq$ 11<br>-15 $\leq$ k $\leq$ 15<br>-16 $\leq$ l $\leq$ 16 | -10 $\leq$ h $\leq$ 12<br>-20 $\leq$ k $\leq$ 20<br>-19 $\leq$ l $\leq$ 19 | -11 $\leq$ h $\leq$ 14<br>-22 $\leq$ k $\leq$ 22<br>-21 $\leq$ l $\leq$ 21 |
| Complete to $2\theta$ (%)      | 94.9                                                                       | 96.4                                                                       | 94.5                                                                       |
| Refinement method              | Full-matrix least-squares on $F^2$                                         | Full-matrix least-squares on $F^2$                                         | Full-matrix least-squares on $F^2$                                         |
| Data/ Restraints/Parameters    | 5282 / 0 / 304                                                             | 4737 / 0 / 343                                                             | 6238 / 0 / 355                                                             |
| Goof ( $F^2$ )                 | 1.038                                                                      | 1.051                                                                      | 1.056                                                                      |
| R indices [ $I > 2\sigma(I)$ ] | 0.0397                                                                     | 0.0583                                                                     | 0.0464                                                                     |
| R indices (all data)           | 0.0576                                                                     | 0.0757                                                                     | 0.0759                                                                     |

| Compound No.                           | <b>7</b>                                                         | <b>8</b>                                                          |
|----------------------------------------|------------------------------------------------------------------|-------------------------------------------------------------------|
| Formulae                               | C <sub>38</sub> H <sub>32</sub> N <sub>4</sub> O <sub>9</sub> Zn | C <sub>34</sub> H <sub>38</sub> N <sub>4</sub> O <sub>12</sub> Zn |
| Mol. wt.                               | 754.05                                                           | 760.05                                                            |
| Crystal system                         | Monoclinic                                                       | Triclinic                                                         |
| Space group                            | P2 <sub>1</sub> /c                                               | P-1                                                               |
| Temperature /K                         | 296                                                              | 296                                                               |
| Wavelength /Å                          | 0.71073                                                          | 0.71073                                                           |
| <i>a</i> /Å                            | 11.4686(7)                                                       | 10.8004 (1)                                                       |
| <i>b</i> /Å                            | 18.0561(11)                                                      | 11.7121(2)                                                        |
| <i>c</i> /Å                            | 17.4989(10)                                                      | 15.6378(2)                                                        |
| $\alpha$ /°                            | 90.00                                                            | 102.683 (1)                                                       |
| $\beta$ /°                             | 103.013(3)                                                       | 106.283 (1)                                                       |
| $\gamma$ /°                            | 90.00                                                            | 101.937 (1)                                                       |
| <i>V</i> / Å <sup>3</sup>              | 3530.6(4)                                                        | 1774.72(4)                                                        |
| <i>Z</i>                               | 4                                                                | 2                                                                 |
| Density/Mgm <sup>-3</sup>              | 1.419                                                            | 1.422                                                             |
| Abs. Coeff. /mm <sup>-1</sup>          | 0.758                                                            | 0.760                                                             |
| Abs. correction                        | None                                                             | None                                                              |
| F(000)                                 | 1560                                                             | 792                                                               |
| Total no. of reflections               | 32573                                                            | 26316                                                             |
| Reflections, <i>I</i> > 2σ( <i>I</i> ) | 6187                                                             | 8670                                                              |
| Max. 2θ/°                              | 25.00                                                            | 28.33                                                             |
| Ranges (h, k, l)                       | -13 ≤ h ≤ 13<br>-21 ≤ k ≤ 21<br>-20 ≤ l ≤ 20                     | -14 ≤ h ≤ 14<br>-15 ≤ k ≤ 15<br>-19 ≤ l ≤ 20                      |
| Complete to 2θ (%)                     | 99.3                                                             | 97.9                                                              |
| Refinement method                      | Full-matrix least-squares on <i>F</i> <sup>2</sup>               | Full-matrix least-squares on <i>F</i> <sup>2</sup>                |
| Data/ Restraints/Parameters            | 6187/ 0 /423                                                     | 8670 / 0 / 476                                                    |
| Goof ( <i>F</i> <sup>2</sup> )         | 1.155                                                            | 1.025                                                             |
| R indices [ <i>I</i> > 2σ( <i>I</i> )] | 0.0911                                                           | 0.0570                                                            |
| R indices (all data)                   | 0.1300                                                           | 0.0919                                                            |

**Some bond distances (Å) and angles (°) in the complexes 1-8:**

| Complex  | Bond distances (Å) and angles (°)                                                                                                                                                                                                                                              |
|----------|--------------------------------------------------------------------------------------------------------------------------------------------------------------------------------------------------------------------------------------------------------------------------------|
| <b>1</b> | Zn1-O2, 1.97; Zn1-O5, 1.95; Na1-O1, 2.42; Na1-O1', 2.45; Na1-O7, 2.37; Na1-O5, 2.38; <O2-Zn1-O5, 109.1; <O2-Zn1-O5', 113.5; <O2-Zn1-O2', 96.0; <O5-Zn1-O5', 114.3; <O7-Na1-O1, 99.0; <O1-Na1-O1', 81.4; <O7-Na1-O1', 115.6.                                                    |
| <b>2</b> | Zn1-N1, 2.06; Zn1-N3, 2.02; Zn1-N5, 2.04; Zn1-O1, 2.20; Zn1-O6, 2.07; <N1-Zn1-N3, 106.7; <N1-Zn1-N5, 128.2; <N1-Zn1-O1, 82.0; <N1-Zn1-O6, 91.1; <N3-Zn1-N5, 124.8, <N3-Zn1-O1, 89.8; <N3-Zn1-O6, 99.8; <N5-Zn1-O1, 91.9; <N5-Zn1-O6, 86.1.                                     |
| <b>3</b> | Zn1-N1, 2.16; Zn1-O1, 2.16; Zn1-O7, 2.04; Zn1-O13, 2.11; Zn1-O14, 2.12; Zn1-O15, 2.09; Zn2-N3, 2.06; Zn2-O5, 2.03; Zn2-O8, 2.14; Zn2-O11, 2.13; Zn2-O16, 1.99; Zn3-N5, 2.08; Zn3-O22, 2.02; Zn3-O24, 2.12; Zn3-O27, 2.11; Zn3-O32, 2.03; Zn4-N7, 2.14; Zn4-O17, 2.14; Zn4-O23, |

Electronic Supplementary Material for CrystEngComm  
 This journal is (c) The Royal Society of Chemistry 2009

|   |                                                                                                                                                                                                                                                                                                                                                                                                                                                                                                                                                                                                                                                                                             |
|---|---------------------------------------------------------------------------------------------------------------------------------------------------------------------------------------------------------------------------------------------------------------------------------------------------------------------------------------------------------------------------------------------------------------------------------------------------------------------------------------------------------------------------------------------------------------------------------------------------------------------------------------------------------------------------------------------|
|   | 2.08; Zn4-O29, 2.08; Zn4-O30, 2.14; Zn4-O31, 2.16; <N1-Zn1-O1, 88.6; <N1-Zn1-O7, 86.2; <N1-Zn1-O13, 90.1; <N1-Zn1-O14, 90.6; <N1-Zn1-O15, 179.1; <O1-Zn1-O7, 88.3; <O1-Zn1-O13, 87.6; <O1-Zn1-O14, 176.4; <O1-Zn1-O15, 91.7; <N3-Zn2-O5, 103.7; <N3-Zn2-O8, 92.1; <N3-Zn2-O11, 89.2; <N3-Zn2-O16, 160.5; <O5-Zn2-O8, 87.9; <O5-Zn2-O11, 91.1; <O5-Zn2-O16, 95.7; <N5-Zn3-O22, 104.0; <N5-Zn3-O24, 92.2; <N5-Zn3-O27, 89.4; <N5-Zn3-O32, 160.6; <O22-Zn3-O24, 86.6; <O22-Zn3-O27, 89.8; <O22-Zn3-O32, 95.3; <N7-Zn4-O17, 90.1; <N7-Zn4-O23, 90.4; <N7-Zn4-O29, 175.8; <N7-Zn4-O30, 87.1; <N7-Zn4-O31, 88.0; <O17-Zn4-O23, 90.7; <O17-Zn4-O29, 91.9; <O17-Zn4-O30, 87.8; <O17-Zn4-O31, 175.0. |
| 4 | Zn1-N1, 2.05; Zn1-O1, 1.98; Zn1-O6, 1.94; Zn1-O7, 2.02; Zn1-O8, 2.41; Na1-O5, 2.42; Na1-O5', 2.43; Na1-O9, 2.31; <N1-Zn1-O1, 105.2; <N1-Zn1-O6, 99.5; <N1-Zn1-O7, 97.7; <N1-Zn1-O8, 151.2; <O1-Zn1-O6, 108.5; <O1-Zn1-O7, 135.0; <O1-Zn1-O8, 89.3; <O6-Zn1-O7, 105.1; <O6-Zn1-O8, 99.3; <O7-Zn1-O8, 56.2; <O9-Na1-O5, 103.4; <O9-Na1-O5', 104.2; <O5-Na1-O5', 81.1.                                                                                                                                                                                                                                                                                                                         |
| 5 | Zn1-N1, 2.15; Zn1-N2, 2.15; Zn1-O1, 2.07; Zn1-O6, 2.07; Zn1-O7, 2.09; Zn1-O8, 2.18; <N1-Zn1-N2, 87.6; <N1-Zn1-O1, 90.0; <N1-Zn1-O6, 92.7; <N1-Zn1-O8, 90.1; <N1-Zn1-O7, 177.4; <N2-Zn1-O1, 92.8; <N2-Zn1-O6, 88.3; <N2-Zn1-O7, 94.9; <N2-Zn1-O8, 175.3; <O1-Zn1-O8, 91.6; <O1-Zn1-O7, 88.8; <O1-Zn1-O6, 177.1; <O7-Zn1-O8, 86.6; <O7-Zn1-O6, 88.3.                                                                                                                                                                                                                                                                                                                                          |
| 6 | Co1-N1, 2.14; Co1-N2, 2.15; Co1-O1, 2.08; Co1-O6, 2.07; Co1-O7, 2.08; Co1-O8, 2.17; <N1-Co1-N2, 87.6; <N1-Co1-O1, 90.0; <N1-Co1-O6, 92.7; <N1-Co1-O8, 90.9; <N1-Co1-O7, 177.3; <N2-Co1-O1, 92.9; <N2-Co1-O6, 88.2; <N2-Co1-O7, 94.9; <N2-Co1-O8, 175.7; <O1-Co1-O8, 91.1; <O1-Co1-O7, 88.8; <O1-Co1-O6, 177.0; <O7-Co1-O8, 86.8; <O7-Co1-O6, 88.4.                                                                                                                                                                                                                                                                                                                                          |
| 7 | Zn1-N1, 2.14; Zn1-N2, 2.12; Zn1-N3, 2.14; Zn1-N4, 2.10; Zn1-O1, 2.30; Zn1-O2, 2.13; <N1-Zn1-N2, 78.4; <N1-Zn1-N3, 90.9; <N1-Zn1-N4, 102.0; <N1-Zn1-O1, 91.7; <N1-Zn1-O2, 150.8; <N2-Zn1-N4, 101.0; <N2-Zn1-O2, 95.4; <N2-Zn1-O1, 89.7; <N2-Zn1-N3, 169.1; <N3-Zn1-N4, 78.80; <N3-Zn1-O1, 92.9; <N3-Zn1-O2, 95.0; <N4-Zn1-O1, 164.0; <N4-Zn1-O2, 107.2; <O1-Zn1-O2, 59.5.                                                                                                                                                                                                                                                                                                                    |
| 8 | Zn1-N1, 2.13; Zn1-N2, 2.11; Zn1-N3, 2.11; Zn1-N4, 2.12; Zn1-O1, 2.21; Zn1-O2, 2.27; <N1-Zn1-N2, 77.8; <N1-Zn1-N3, 98.9; <N1-Zn1-N4, 173.8; <N1-Zn1-O1, 91.4; <N1-Zn1-O2, 93.5; <N2-Zn1-N4, 99.2; <N2-Zn1-O2, 94.4; <N2-Zn1-O1, 150.3; <N2-Zn1-N3, 113.7; <N3-Zn1-N4, 77.1; <N3-Zn1-O1, 95.1; <N3-Zn1-O2, 151.0; <N4-Zn1-O1, 93.7; <N4-Zn1-O2, 92.1; <O1-Zn1-O2, 58.4.                                                                                                                                                                                                                                                                                                                       |

Fluorescence emission of the ligand and complexes ( $10^{-3}$  M in dimethylsulphoxide):

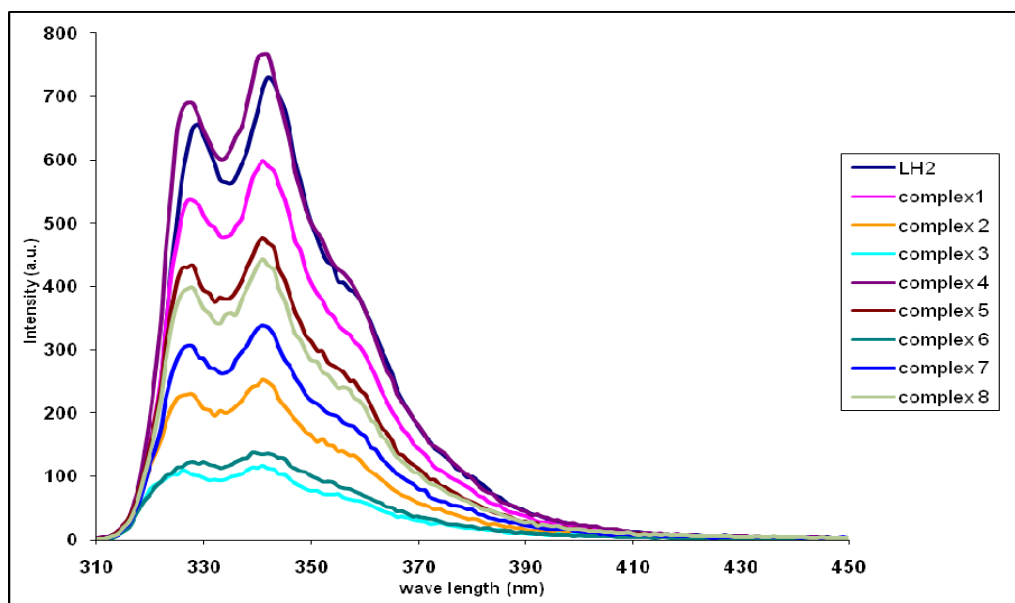

For LH<sub>2</sub>, Excitation wavelength = 290 nm, Emission wavelength = 330 and 343 nm.

For complexes, Excitation wavelength = 290 nm, Emission wavelength= 327 and 342 nm.
